# Supplementary material
Source: PubMed Central journal article supplement (PMC1307594)
Supplement: 3-embor037-s1.pdf [file 3-embor037-s1.pdf]

| Arf related subfamilies | Proteins and accession numbers                                                                                                                                                                                                                                                                                                                                                                                                                                                                                                                                                                                           |
|-------------------------|--------------------------------------------------------------------------------------------------------------------------------------------------------------------------------------------------------------------------------------------------------------------------------------------------------------------------------------------------------------------------------------------------------------------------------------------------------------------------------------------------------------------------------------------------------------------------------------------------------------------------|
| Arfs/Arl1               | <p>6 members in <i>Hs</i>: Arf1, Arf3, Arf4, Arf5, Arf6, Arl1 - P32889, P16586, P18085, P26437, P26438, P40616</p> <p>4 members in <i>Dm</i>: Arf1, Arf2, Arf3 (probable Arf6 ortholog), Arl1 - P35676, P40945, P40946, P25160</p> <p>5 members in <i>Ce</i>: Arf1, Arf2*, Arf6, Arf7*, Arl1* - Q10943, O45099, Q9U2S4, Q94231, Q20758</p> <p>4 members in <i>Sc</i>: Arf1, Arf2, Arf3, Arl1 - P11076, P19146, P40994, P38116</p> <p>9 members in <i>At</i>: Arf1, Arf2, Arf3, Arf4, Arf5, Arf6, Arf7, Arf8, Arf9 - At3g62290, At2g47170, At1g23490, At1g70490, At1g10630, At5g14670, At5g17060, At3g03120, Atg15310</p> |
| Arl2/Arl3               | <p>2 members in <i>Hs</i>: Arl2, Arl3 - P36404, P36405</p> <p>2 members in <i>Dm</i>: Arl2, Arl3* - Q06849, Q9VD64</p> <p>2 members in <i>Ce</i>: Arl2*, Arl3 - Q19705,</p> <p>1 member in <i>Sc</i>: CIN4 - P39110</p> <p>1 member in <i>At</i>: TITAN5 - At2g18390</p>                                                                                                                                                                                                                                                                                                                                                 |
| Arl4/Arl7               | <p>5 members in <i>Hs</i>: Arl4, Arl7, Arl4L (previously reported as Arl6), [Arl4b*], [Arl4c*] - P40617, P56559, P49703, [XP_015936], [XP_166703]</p> <p>1 member in <i>Dm</i>: Arl4* - Q9V4B2 (probably an incomplete sequence)</p>                                                                                                                                                                                                                                                                                                                                                                                     |
| Arl5                    | <p>2 members in <i>Hs</i>: Arl5, Arl5like - Q9Y689, Q96KC2</p> <p>1 member in <i>Dm</i>: Arl5* - Q9VSG8</p> <p>1 member in <i>Ce</i>: Arl5* - P34212</p> <p>1 member in <i>At</i>: Arl5* - At3g22950</p>                                                                                                                                                                                                                                                                                                                                                                                                                 |
| Arl6                    | <p>1 member in <i>Hs</i>: Arl6 - Q9H0F7</p> <p>1 member in <i>Dm</i>: Arl6* - Q9V8V0</p> <p>1 member in <i>Ce</i>: Arl6* - Q18510</p>                                                                                                                                                                                                                                                                                                                                                                                                                                                                                    |
| ARP                     | <p>1 member in <i>Hs</i>: ARP - Q13795</p> <p>1 member in <i>Dm</i>: ARP* - Q95RP3</p> <p>1 member in <i>Ce</i>: ARP* - Q9N3C8</p> <p>1 member in <i>Sc</i>: Arl3 - Q02804</p> <p>1 member in <i>At</i>: ARP* - At5g52210</p>                                                                                                                                                                                                                                                                                                                                                                                            |
| Sar                     | <p>3 members in <i>Hs</i>: Sar1a, Sar1b, [Sar1c*] - Q9NR31, Q9Y6B6, [XP_068220]</p> <p>1 member in <i>Dm</i>: Sar1 - Q9VD29</p> <p>1 member in <i>Ce</i>: Sar1 - Q23445</p> <p>1 member in <i>Sc</i>: Sar1 - P20606</p> <p>4 members in <i>At</i>: Sar1a, Sar1b, Sar1b'*, Sar1c* - At4g02080, At1g56330, At1g09180, At3g62560</p>                                                                                                                                                                                                                                                                                        |
| Arl8                    | <p>2 members in <i>Hs</i>: Arl8a*, Arl8b* - Q9NVJ2, Q96BM9</p> <p>1 member in <i>Dm</i>: Arl8* - Q9VHV5</p> <p>1 member in <i>Ce</i>: Arl8* - O18237</p> <p>3 members in <i>At</i>: Arl8a*, Arl8b*, Arl8c* - At3g49870, At5g67560, At5g37680</p>                                                                                                                                                                                                                                                                                                                                                                         |

**Table 3.** A detailed list of members of each Arf-related subfamily. Sequences labelled with \* are presently unnamed. SWISS-PROT/TrEMBL accession numbers are provided, except *Arabidopsis thaliana* for which gene accession numbers are listed. Sequences in brackets (NCBI accession number provided) may have errors.

**Figure 4** : Interspecies sequence alignment of Arf family proteins from mammals, *A. thaliana*, *C. elegans*, *D. melanogaster* and *S. cerevisiae*.

HsArf6 1 ----MGK-----VLSKIFGNK-EMRILMLGLDAAGKTTILYKCLKG--QSVT-----TIPTVGFNVT-----VTYKNVKNFVWVWVGGQDKIRPLWRHYTGT  
RnArf6 1 ----MGK-----VLSKIFGNK-EMRILMLGLDAAGKTTILYKCLKG--QSVT-----TIPTVGFNVT-----VTYKNVKNFVWVWVGGQDKIRPLWRHYTGT  
DmArf3 1 ----MGK-----LSSKIFGNK-EMRILMLGLDAAGKTTILYKCLKG--QSVT-----TIPTVGFNVT-----VTYKNVKNFVWVWVGGQDKIRPLWRHYTGT  
CeArf6 1 ----MGK-----FLSKIFGKK-ELRILMLGLDAAGKTTILYKCLKG--QSVT-----TIPTVGFNVT-----VTYKNVKNFVWVWVGGQDKIRPLWRHYTGT  
ScArf3 1 --MGNSISK-----VLGKLFSGK-EMKILMLGLDAGKTTILYKCLKN--KIKT-----STPTVGFNVT-----VTYKNVKNFVWVWVGGQDKIRPLWRHYFPAT  
HsArf4 1 --MGLTISS-----LFSRLFGKK-QMRILMVGLDAAGKTTILYKCLKG--EIVT-----TIPTIGFNVT-----VEYKNICFTVWVWVGGQDKIRPLWRHYFQNT  
RnArf4 1 --MGLTISS-----LFSRLFGKK-QMRILMVGLDAAGKTTILYKCLKG--EIVT-----TIPTIGFNVT-----VEYKNICFTVWVWVGGQDKIRPLWRHYFQNT  
HsArf5 1 --MGLTVSA-----LFSRIFGKK-QMRILMVGLDAAGKTTILYKCLKG--EIVT-----TIPTIGFNVT-----VEYKNICFTVWVWVGGQDKIRPLWRHYFQNT  
RnArf5 1 --MGLTVSA-----LFSRIFGKK-QMRILMVGLDAAGKTTILYKCLKG--EIVT-----TIPTIGFNVT-----VEYKNICFTVWVWVGGQDKIRPLWRHYFQNT  
DmArf2 1 --MGLTISS-----LFSRLFGKK-QMRILMVGLDAAGKTTILYKCLKG--EIVT-----TIPTIGFNVT-----VEYKNICFTVWVWVGGQDKIRPLWRHYFQNT  
CeArf2 1 --MGLTISS-----LFSRLFGKK-QMRILMVGLDAAGKTTILYKCLKG--EIVT-----TIPTIGFNVT-----VEYKNICFTVWVWVGGQDKIRPLWRHYFQNT  
DmArf1 1 --MGNVFAN-----LFGKLFGKK-EMRILMLGLDAAGKTTILYKCLKG--EIVT-----TIPTIGFNVT-----VEYKNISFTVWVWVGGQDKIRPLWRHYFQNT  
CeArf1 1 --MGNVFAN-----LFGKLFGKK-EMRILMLGLDAAGKTTILYKCLKG--EIVT-----TIPTIGFNVT-----VEYKNISFTVWVWVGGQDKIRPLWRHYFQNT  
HsArf1 1 --MGNIFAN-----LFGKLFGKK-EMRILMLGLDAAGKTTILYKCLKG--EIVT-----TIPTIGFNVT-----VEYKNISFTVWVWVGGQDKIRPLWRHYFQNT  
RnArf1 1 --MGNIFAN-----LFGKLFGKK-EMRILMLGLDAAGKTTILYKCLKG--EIVT-----TIPTIGFNVT-----VEYKNISFTVWVWVGGQDKIRPLWRHYFQNT  
HsArf3 1 --MGNIFGN-----LLKSLIGKK-EMRILMLGLDAAGKTTILYKCLKG--EIVT-----TIPTIGFNVT-----VEYKNISFTVWVWVGGQDKIRPLWRHYFQNT  
RnArf3 1 --MGNIFGN-----LLKSLIGKK-EMRILMLGLDAAGKTTILYKCLKG--EIVT-----TIPTIGFNVT-----VEYKNISFTVWVWVGGQDKIRPLWRHYFQNT  
RnArf2 1 --MGNVFEK-----LFSKLFGKK-EMRILMLGLDAAGKTTILYKCLKG--EIVT-----TIPTIGFNVT-----VEYKNISFTVWVWVGGQDKIRPLWRHYFQNT  
AtArf3 1 --MGLSFAK-----LFSRLFAKK-EMRILMLGLDAAGKTTILYKCLKG--EIVT-----TIPTIGFNVT-----VEYKNISFTVWVWVGGQDKIRPLWRHYFQNT  
AtArf4 1 --MGLSFAK-----LFSRLFAKK-EMRILMLGLDAAGKTTILYKCLKG--EIVT-----TIPTIGFNVT-----VEYKNISFTVWVWVGGQDKIRPLWRHYFQNT  
AtArf2 1 --MGLSFGK-----LFSRLFAKK-EMRILMLGLDAAGKTTILYKCLKG--EIVT-----TIPTIGFNVT-----VEYKNISFTVWVWVGGQDKIRPLWRHYFQNT  
AtArf5 1 --MGLSFAK-----LFSRLFAKK-EMRILMLGLDAAGKTTILYKCLKG--EIVT-----TIPTIGFNVT-----VEYKNISFTVWVWVGGQDKIRPLWRHYFQNT  
AtArf1 1 --MGLSFGK-----LFSKLFPAK-EMRILMLGLDAAGKTTILYKCLKG--EIVT-----TIPTIGFNVT-----VEYKNISFTVWVWVGGQDKIRPLWRHYFQNT  
AtArf6 1 --MGLNFTK-----LFSRLFAKK-EMRILMLGLDAAGKTTILYKCLKG--EIVT-----TIPTIGFNVT-----VEYKNISFTVWVWVGGQDKIRPLWRHYFQNT  
ScArf1 1 --MGLFASK-----LFSNLFGNK-EMRILMLGLDAGKTTVLYKCLKG--EIVT-----TIPTIGFNVT-----VQYKNISFTVWVWVGGQDKIRPLWRHYFQNT  
ScArf2 1 --MGLYASK-----LFSNLFGNK-EMRILMLGLDAGKTTVLYKCLKG--EIVT-----TIPTIGFNVT-----VQYKNISFTVWVWVGGQDKIRPLWRHYFQNT  
AtArf9 1 --MGARFSR-----IAKRLPKS-KVRILMLGLDGSAGKTTILYKCLKG--EIVT-----TVPTIGFNLET-----VEYKINFTVWVWVGGQDKIRPLWRHYFQNA  
CeArf7 1 --MGLFFSK-----ISSFMFNI-ECRTLMLGLDAGKTTILYKCLKN--EIVT-----TIPTIGFNVT-----VTFOKITLVWVWVGGQDKIRALWKYFPNT  
AtArf7 1 --MGQAFRK-----LFDTFFGNQ-EMRVVMLGLDAAGKTTILYKHLIG--EVLV-----TVPTIGFNVEK-----VQYKNVMTVWVWVGGQDKIRPLWRHYFQNT  
AtArf8 1 --MGQTFRK-----LFDTFFGNQ-EMRVVMLGLDAAGKTTILYKHLIG--EVLV-----TVPTIGFNVEK-----VQYKNVMTVWVWVGGQDKIRPLWRHYFQNT  
DmArf11 1 --MGGVLS-----YFRGLLSR-EMRILMLGLDAGKTTILYKLVQV--EIVT-----TIPTIGFNVEQ-----VTYKNLKFQVWVWVGGQTSIRPYWRCYYSNT  
CeArf11 1 --MGGVMS-----YFRGLFGAR-EMRILMLGLDAGKTTILYKLVQV--EIVT-----TIPTIGFNVEQ-----VEYKNLKFQVWVWVGGQTSIRPYWRCYYSNT  
HsArf11 1 --MGGFSS-----IFSSLGTR-EMRILMLGLDAGKTTILYKLVQV--EIVT-----TIPTIGFNVT-----VTYKNLKFQVWVWVGGQTSIRPYWRCYYSNT  
RnArf11 1 --MGGFSS-----IFSSLGTR-EMRILMLGLDAGKTTILYKLVQV--EIVT-----TIPTIGFNVT-----VTYKNLKFQVWVWVGGQTSIRPYWRCYYSNT  
ScArf11 1 --MGNIFSS-----MFDKLGWSNKEIRLILGLDAGKTTILYKLVQV--EIVT-----TKPTIGFNVT-----LSYKNLKLNVWVWVGGQTSIRPYWRCYYSNT  
HsArf12 1 --MGLLT-----LKKMKQK-ERELRLLMLGLDAGKTTILKKFNEDIDT-----ISPTLGFNIKT-----LEHRG-FKLNLDVWVWVGGQKLSRSYWRNYFEST  
RnArf12 1 --MGLLT-----LKKMKQK-ERDVRLLMLGLDAGKTTILKKFNEDIDT-----ISPTLGFNIKT-----LEHRG-FKLNLDVWVWVGGQKLSRSYWRNYFEST  
DmArf12 1 --MGFLT-----VLKMKRQK-EREMRILMLGLDAGKTTILKKFNEDIDT-----ISPTLGFNIKT-----LEHRG-FKLNLDVWVWVGGQKLSRSYWRNYFEST  
CeArf12 1 --MGFLK-----LIRKQAR-EREMRILMLGLDAGKTTILMKKFLDEPTDT-----IEPTLGFDIKT-----VHFKD-FQNLNVWVWVGGQKLSRSYWRNYFEST  
AtTITAN5 1 --MGLLS-----LIRKIKK-EEKMRILMLGLDAGKTTIVLKLNGEDTSV-----ISPTLGFNIKT-----LIIYQK-YLNLNVWVWVGGQKLSRSYWRNYFEST  
HsArf13 1 --MGLLS-----LIRKLSAPDQEVIRILLGLDAGKTTILKQLASEDISH-----ITPTQGFNIKS-----VQSQG-FKLNVDWVWVGGQKLSRSYWRNYFEST  
RnArf13 1 --MGLLS-----LIRKLSAPDQEVIRILLGLDAGKTTILKQLASEDISH-----ITPTQGFNIKS-----VQSQG-FKLNVDWVWVGGQKLSRSYWRNYFEST  
DmArf13 1 --MGLLS-----LIRKLRNPEKEARILLGLDAGKTTILKQLASEDIT-----VPTTAGFNIKS-----VAADG-FKLNVDWVWVGGQKLSRSYWRNYFEST  
CeArf13 1 --MGLID-----VLKSKFSPGRIIRILLGLDAGKTTILKQLASEDQV-----VTPTKGFNVKT-----VAAMGDRLNVWVWVGGQKLSRSYWRNYFEST  
ScCIN4 1 --MGLLS-----LIRKQAR-DEIRCLLMLGLDAGKTTILYKLVQV--EIVT-----IMPTVGFQIHS-----LMIKD-VTISLWVWVWVGGQKLSRSYWRNYFEST  
HsArf14 1 --MGNGLSDQT-----SILSNLPSFQSFHIVILGLDAGKTTVLYRQLFN--EIVT-----TVPTKGFNTEK-----IKVTLGNSKTIVTFHFVWVWVGGQKLSRSYWRNYFEST  
RnArf14 1 --MGNGLSDQT-----SILSNLPSFQSFHIVILGLDAGKTTVLYRQLFN--EIVT-----TVPTKGFNTEK-----IKVTLGNSKTIVTFHFVWVWVGGQKLSRSYWRNYFEST  
[HsArf14b] 1 --MGNGLSDQT-----SILSNLPSFQSFHIVILGLDAGKTTVLYRQLFN--EIVT-----TVPTKGFNTEK-----IKVTLGNSKTIVTFHFVWVWVGGQKLSRSYWRNYFEST  
[HsArf14c] 1 --MGNGLSDQT-----SILSNLPSFQSFHIVMLGLDAGKTTVLYRQLFN--EIVT-----TVPTKAFNTEK-----IKVTLGNSKTIVTFHFVWVWVGGQKLSRSYWRNYFEST  
HsArf17 1 --MGN-----ISSNISAFQSLHIVMLGLDAGKTTVLYRQLFN--EIVT-----TVPTIGFNTEK-----IKLSNGTAGKISCHFVWVWVGGQKLSRSYWRNYFEST  
HsArf4L 1 --MGNHLTEMA-----PTASSLPHFQALHVVMLGLDAGKTTSLYRKLFF--EFVQ-----SVPTKGFNTEK-----IRVPLGGSRTIFVWVWVGGQKLSRSYWRNYFEST  
DmArf14 1 --MGLDLSAGKTTALYRKLFD--QYLN-----TVPTIGFNCEKVCVQCTLGKAGVHFLVWVWVGGQKLSRSYWRNYFEST  
HsArf15 1 --MGLIFTR-----IWR-LFNHQ-EHKVIVGLDAGKTTILYQFSMN--EIVT-----TSPTIGSNVEE-----IVNNTFRFLMWDIGGQKLSRSYWRNYFEST  
RnArf15 1 --MGLIFTR-----IWR-LFNHQ-EHKVIVGLDAGKTTILYQFSMN--EIVT-----TSPTIGSNVEE-----IVNNTFRFLMWDIGGQKLSRSYWRNYFEST  
HsArf15like 1 --MGLIFAK-----LWS-LFCNQ-EHKVIVGLDAGKTTILYQFLMN--EIVT-----TSPTIGSNVEE-----IVNNTFRFLMWDIGGQKLSRSYWRNYFEST  
DmArf15 1 --MGLLSR-----LWR-MFNE-EHKLVMVGLDAGKTTILYQFLMN--EIVT-----TSPTIGSNVEE-----IVNNTFRFLMWDIGGQKLSRSYWRNYFEST  
AtArf15 1 --MGAFMSR-----FWMFPAP-EYKIVVGLDAGKTTILYRHLHG--EIVT-----THPTVGSNVEE-----LVYKNIRFVWVWVGGQKLSRSYWRNYFEST  
CeArf15 1 --MGLIMAK-----LFSQWIGK-KYKIVVGLDAGKTTILYNYVTK--DQVE-----TKPTIGSNVEE-----VSYNLDVFLWVWVGGQKLSRSYWRNYFEST  
DmArf16 1 --MGLMLN-----LADLIKIKKDKMTLIVLGLNNSGKSSIIINHFKSSQTSI-----VVPTVGMVEQFYIG-----M-SGVSIKADMSGATRYNRLWEHQYKNT  
HsArf16 1 --MGLLDR-----LSVLLGLKKVEHVLCGLDNSGKTTIINKLKPSNAQSQN-----LPTLTIQFSIEKFS-----SSLSTVFDMSGQGRYRNLWEHQYKNT  
CeArf16 1 --MGFFSS-----LSSLFLGKDDVNIIVVGLDAGKTTILNQKLPETRSQ-----IVPTVGHVVTNEST-----QNLSFHAEDMAGQMKYRSTWESYFSS  
HsARP 1 --MYTLLSG-----LYKYMFKD-EYCILMLGLDAGKTTFLQSKTRFNKNGMSLSKITTTVGLNIGTVDV-----KARLMFVWVWVGGQKLSRSYWRNYFEST  
RnARP 1 --MYTLLSG-----LYKYMFKD-EYCILMLGLDAGKTTFLQSKTRFNKNGMSLSKITTTVGLNIGTVDV-----KARLMFVWVWVGGQKLSRSYWRNYFEST  
DmARP 1 --MYTLMHG-----FYKYMFKD-DYCVVILGLDAGKTTYLEAATFTFRNYKGLNPSKITTTVGLNIGTVDV-----GVLNLDVWVWVGGQKLSRSYWRNYFEST  
ScArf13 1 --MFHLVKG-----LYNNWNKKE-QYSILMLGLDAGKTTFLRLKKEYSLAF--ALEKIQPTVQNVATI PVDS-----QILKLFVWVWVGGQKLSRSYWRNYFEST  
CeARP 1 --MYTLLSAG-----IWEKFFKK-DYVVIVGLDAGKTTFLQSKTSHFVKDGVLPNSKITATVGLNTGNVELN-----NTCLHFVWVWVGGQKLSRSYWRNYFEST  
AtARP 1 --MFLMSG-----LWSYMFSKT-EFNVLLILGLDAGKTTFLKLEKLTYSISEG-LPHDRIVPTVGLNIGRIEVS-----NAKIVFVWVWVGGQKLSRSYWRNYFEST  
DmSar1 1 --MFLWDFY-G-----VLGLGLLWKKSGKLLFLGLDAGKTTLLHMLKDD--RLAQ-----HVPTLHPTSEE-----LTIAGMTFTFDLGGHQARVWVWVGGQKLSRSYWRNYFEST  
CeSar1 1 --MFLWDFN-G-----VLNMLGLANKKGLVFLGLDAGKTTLLHMLKDD--RLAQ-----HVPTLHPTSEE-----LTIAGMTFTFDLGGHQARVWVWVGGQKLSRSYWRNYFEST  
HsSar1a 1 --MSFIFEWIYNGFSSVQLQFLGLYKKSGLVFLGLDAGKTTLLHMLKDD--RLGQ-----HVPTLHPTSEE-----LTIAGMTFTFDLGGHQARVWVWVGGQKLSRSYWRNYFEST  
HsSar1b 1 --MSFIFDWIYSGFSSVQLQFLGLYKKSGLVFLGLDAGKTTLLHMLKDD--RLGQ-----HVPTLHPTSEE-----LTIAGMTFTFDLGGHQARVWVWVGGQKLSRSYWRNYFEST  
[HsSar1c] 1 --MSFIFEWIYNGFSSVQPQFLGLNKKSGKLLFLGLDAGKTTLLHMLKDD--RLGQ-----HIPTLHLSKE-----LTIAGMTFTFDLGGHQARVWVWVGGQKLSRSYWRNYFEST  
AtSar1a 1 --MFLWDFY-G-----VLASLGLWQKRAKILFLGLDAGKTTLLHMLKDD--RLVQ-----HQPQHTPSEE-----LSIGIKFKAFDLGGHQARVWVWVGGQKLSRSYWRNYFEST  
AtSar1c 1 --MFLWDFY-G-----VLATLGLWQKRAKILFLGLDAGKTTLLHMLKDD--RLVQ-----HQPQHTPSEE-----LSIGIKFKAFDLGGHQARVWVWVGGQKLSRSYWRNYFEST  
AtSar1b 1 --MFLWDFY-G-----VLASLGLWQKRAKILFLGLDAGKTTLLHMLKDD--RLVQ-----HQPQHTPSEE-----LSIGIKFKAFDLGGHQARVWVWVGGQKLSRSYWRNYFEST  
AtSar1b' 1 --MFLWDFY-G-----VLASLGLWQKRAKILFLGLDAGKTTLLHMLKDD--RLVQ-----HQPQHTPSEE-----LSIGIKFKAFDLGGHQARVWVWVGGQKLSRSYWRNYFEST  
ScSar1 1 MAGDWIFGWR-----DVLASLGLWQKRAKILFLGLDAGKTTLLHMLKDD--RLAT-----LQPTWHPTSEE-----LSIGIKFTFDLGGHQARVWVWVGGQKLSRSYWRNYFEST  
HsArf18a 1 --MIALFNKLLD-----WPKALFWKEEMELTLVGLQYSGKTTFVNVIASG--QFND-----MIPVGFNMRK-----ITKGNVTIKLWDIGGQKLSRSYWRNYFEST  
HsArf18b 1 --MLALISRLD-----WFRSLFWKEEMELTLVGLQYSGKTTFVNVIASG--QFSD-----MIPVGFNMRK-----VTKGNVTIKLWDIGGQKLSRSYWRNYFEST  
DmArf18 1 --MLALINRLE-----WFKSIFWKEEMELTLVGLQYSGKTTFVNVIASG--QFAED-----MIPVGFNMRK-----ITRGNVTIKLWDIGGQKLSRSYWRNYFEST  
CeArf18 1 --MLAMVNVLD-----WIRSLFWKEEMELTLVGLQYSGKTTFVNVIASG--QFTE-----MIPVGFNMRK-----ITKGNVTIKLWDIGGQKLSRSYWRNYFEST  
AtArf18a 1 --MGLLEAFLN-----WLRSLFFKQEMELSLIQLDAGKTTSLVNVVATG--GYSED-----MIPVGFNMRK-----VTKGNVTIKLWDIGGQKLSRSYWRNYFEST  
AtArf18b 1 --MGLWDAFLN-----WLRSLFFKQEMELSLIQLDAGKTTSLVNVVATG--GYSED-----MIPVGFNMRK-----VTKGNVTIKLWDIGGQKLSRSYWRNYFEST  
AtArf18c 1 --MGLWDSLNN-----WLRSLFFKQEMELSLVGLDAGKTTSLVNVVATG--GYSED-----MIPVGFNMRK-----VTKGNVTIKLWDIGGQKLSRSYWRNYFEST

HsArf6 82 QGLIFVVDCAADDRIDEARQELHRIINDREMRD---AIIILIFANKQDLPDAMKPHE----IQEKLGLTR-----IRDRNWYVQPSCATS GDGLYEGLTWLT S  
RnArf6 82 QGLIFVVDCAADDRIDEARQELHRIINDREMRD---AIIILIFANKQDLPDAMKPHE----IQEKLGLTR-----IRDRNWYVQPSCATS GDGLYEGLTWLT S  
DmArf3 82 QGLIFVVDCAADDRIDEARTELEHRIINDREMRD---AIIILIFANKQDLPDAMKPHE----IQEKLGLTR-----IRDRNWYVQPSCATS GDGLSEGLTWLT S  
CeArf6 82 QALIFVMDAADRRVDEARMELEHRIINDREMRKE---AIIILVFNKQDLADAMKPHE----IQDKLGLTR-----IRDRNWYVQPSCATS GDGLHGLTWL S Q  
ScArf3 85 TALIFVVIDSSARNRMEAEKEELYSIIGEKEMEN---VVLLVFNKQDLKDKAMKQPE----VSDFLLELEK-----N-LKNQPWCVIGSNALS GDGLYEGLSWIS N  
HsArf4 86 QGLIFVVDSDNDRERIQEVADELQKMLLVDELDRD---AVLLVFNKQDLPNAMAISE---MTDKLGLQS-----LRNRTWYVQATCATQGTGLYEGLDWLS N  
RnArf4 86 QGLIFVVDSDNDRERIQEVADELQKMLLVDELDRD---AVLLVFNKQDLPNAMAISE---MTDKLGLQS-----LRNRTWYVQATCATQGTGLYEGLDWLS N  
HsArf5 86 QGLIFVVDSDNDRERVQESADELQKMLQDEDELDRD---AVLLVFNKQDMPNAMPVSE---LTDKLGLOH-----LRNRTWYVQATCATQGTGLYEGLDWLS H  
RnArf5 86 QGLIFVVDSDNDRERVQESADELQKMLQDEDELDRD---AVLLVFNKQDMPNAMPVSE---LTDKLGLOH-----LRNRTWYVQATCATQGTGLYEGLDWLS H  
DmArf2 86 QGLIFVVDSDNDRERITEAERELQNMQLQDEDELDRD---AVLLVFNKQDLPNAMAIAE---MTDKLGLQS-----LRNRTWYVQATCATQGTGLYEGLDWLS A  
CeArf2 86 QGLIFVVDSDNDRERIEESREELHKLMLNEDELDRD---ATLLVFNKQDLPNAMAIAE---LTDKLGLOH-----LRNRTWYVQATCATQGTGLYEGLDWLS N  
DmArf1 86 QGLIFVVDSDNDRERIEGEAREELMRMLAEDELDRD---AVLLVFNKQDLPNAMAIAE---LTDKLGLOH-----LRNRTWYVQATCATQGTGLYEGLDWLS N  
CeArf1 86 QGLIFVVDSDNDRERVGEAREELMRMLAEDELDRD---AVLLVFNKQDLPNAMAIAE---LTDKLGLOH-----LRNRTWYVQATCATQGTGLYEGLDWLS N  
HsArf1 86 QGLIFVVDSDNDRERVGEAREELMRMLAEDELDRD---AVLLVFNKQDLPNAMAIAE---LTDKLGLOH-----LRNRTWYVQATCATQGTGLYEGLDWLS N  
RnArf1 86 QGLIFVVDSDNDRERVNEAREELMRMLAEDELDRD---AVLLVFNKQDLPNAMAIAE---LTDKLGLOH-----LRNRTWYVQATCATQGTGLYEGLDWLS N  
HsArf3 86 QGLIFVVDSDNDRERVNEAREELMRMLAEDELDRD---AVLLVFNKQDLPNAMAIAE---LTDKLGLOH-----LRNRTWYVQATCATQGTGLYEGLDWLS N  
RnArf3 86 QGLIFVVDSDNDRERVNEAREELMRMLAEDELDRD---AVLLVFNKQDLPNAMAIAE---LTDKLGLOH-----LRNRTWYVQATCATQGTGLYEGLDWLS N  
RnArf2 86 QGLIFVVDSDNDRERVNEAREELTRMLAEDELDRD---AVLLVFNKQDLPNAMAIAE---LTDKLGLOH-----LRNRTWYVQATCATQGTGLYEGLDWLS N  
AtArf3 86 QGLIFVVDSDNDRERVVEARDELHRLMLNEDELDRD---AVLLVFNKQDLPNAMAIAE---LTDKLGLOH-----LRNRTWYVQATCATQGTGLYEGLDWLS N  
AtArf4 86 QGLIFVVDSDNDRERVVEARDELHRLMLNEDELDRD---AVLLVFNKQDLPNAMAIAE---LTDKLGLOH-----LRNRTWYVQATCATQGTGLYEGLDWLS N  
AtArf2 86 QGLIFVVDSDNDRRVVEARDELHRLMLNEDELDRD---AVLLVFNKQDLPNAMAIAE---LTDKLGLOH-----LRNRTWYVQATCATQGTGLYEGLDWLS N  
AtArf5 86 QGLIFVVDSDNDRRVVEARDELHRLMLNEDELDRD---AVLLVFNKQDLPNAMAIAE---LTDKLGLOH-----LRNRTWYVQATCATQGTGLYEGLDWLS N  
AtArf6 86 QGLIFVVDSDNDRRVVEARDELHRLMLNEDELDRD---AVLLVFNKQDLPNAMAIAE---LTDKLGLOH-----LRNRTWYVQATCATQGTGLYEGLDWLS N  
ScArf1 85 EGVIFVVDSDNDRSRIGEAREVMQRMLNEDELDRN---AAWLVFNKQDLPNAMAIAE---LTDKLGLOH-----LRNRTWYVQATCATQGTGLYEGLDWLS N  
ScArf2 85 EGVIFVVDSDNDRSRIGEAREVMQRMLNEDELDRN---AAWLVFNKQDLPNAMAIAE---LTDKLGLOH-----LRNRTWYVQATCATQGTGLYEGLDWLS N  
AtArf9 86 QGLIFVVDSDNDRSRIEAKQEFQDIIKDPFMLN---SIIILVFNKQDMPNAMPVSE---VCEGLGLFD-----LKNRKHIIQGTCLARGGDGLYEGLDWLS S  
CeArf7 86 TTLVVDSDNDRSRIEAKQEFQDIIKDPFMLN---SIIILVFNKQDMPNAMPVSE---VCEGLGLFD-----LKNRKHIIQGTCLARGGDGLYEGLDWLS S  
AtArf7 86 DGLIYVVDSDNDRSRIEAKQEFQDIIKDPFMLN---SIIILVFNKQDMPNAMPVSE---VCEGLGLFD-----LKNRKHIIQGTCLARGGDGLYEGLDWLS S  
AtArf8 86 DGLIYVVDSDNDRSRIEAKQEFQDIIKDPFMLN---SIIILVFNKQDMPNAMPVSE---VCEGLGLFD-----LKNRKHIIQGTCLARGGDGLYEGLDWLS S  
DmAr11 85 DAIYVVDSDADRDRIGISKDELLEMLREEELAG---AIIILVFNKQDMPNAMPVSE---VCEGLGLFD-----LKNRKHIIQGTCLARGGDGLYEGLDWLS S  
CeAr11 85 DAIYVVDSDADRDRIGISKDELLEMLREEELAG---AIIILVFNKQDMPNAMPVSE---VCEGLGLFD-----LKNRKHIIQGTCLARGGDGLYEGLDWLS S  
HsAr11 86 DAVIYVVDSDADRDRIGISKSELVAMLEEEELRK---AIIILVFNKQDMPNAMPVSE---VCEGLGLFD-----LKNRKHIIQGTCLARGGDGLYEGLDWLS S  
RnAr11 86 DAVIYVVDSDADRDRIGISKSELVAMLEEEELRK---AIIILVFNKQDMPNAMPVSE---VCEGLGLFD-----LKNRKHIIQGTCLARGGDGLYEGLDWLS S  
ScAr11 86 AAVIYVVDSDADRDRIGISKSELVAMLEEEELRK---AIIILVFNKQDMPNAMPVSE---VCEGLGLFD-----LKNRKHIIQGTCLARGGDGLYEGLDWLS S  
HsAr12 85 DGLIYVVDSDADRDRIGISKSELVAMLEEEELRK---AIIILVFNKQDMPNAMPVSE---VCEGLGLFD-----LKNRKHIIQGTCLARGGDGLYEGLDWLS S  
RnAr12 85 DGLIYVVDSDADRDRIGISKSELVAMLEEEELRK---AIIILVFNKQDMPNAMPVSE---VCEGLGLFD-----LKNRKHIIQGTCLARGGDGLYEGLDWLS S  
DmAr12 85 DGLIYVVDSDADRDRIGISKSELVAMLEEEELRK---AIIILVFNKQDMPNAMPVSE---VCEGLGLFD-----LKNRKHIIQGTCLARGGDGLYEGLDWLS S  
CeAr12 85 DGLIYVVDSDADRDRIGISKSELVAMLEEEELRK---AIIILVFNKQDMPNAMPVSE---VCEGLGLFD-----LKNRKHIIQGTCLARGGDGLYEGLDWLS S  
AtTITAN5 85 DGLIYVVDSDADRDRIGISKSELVAMLEEEELRK---AIIILVFNKQDMPNAMPVSE---VCEGLGLFD-----LKNRKHIIQGTCLARGGDGLYEGLDWLS S  
HsAr13 86 DILYIYVDSADRKRFEETGQELAELEEEELKSC---VPVLIYFNKQDLPNAMAIAE---LTDKLGLOH-----LRNRTWYVQATCATQGTGLYEGLDWLS N  
RnAr13 86 DILYIYVDSADRKRFEETGQELAELEEEELKSC---VPVLIYFNKQDLPNAMAIAE---LTDKLGLOH-----LRNRTWYVQATCATQGTGLYEGLDWLS N  
DmAr13 86 DVLIIYVIDCDTRRLPEAGSELFEMLMNRLKQ---VPVLIYFNKQDLPNAMAIAE---LTDKLGLOH-----LRNRTWYVQATCATQGTGLYEGLDWLS N  
CeAr13 87 DTLIYVIDSDNDRKRFDEMNIELGELLDEEELKSC---VPVLIYFNKQDLPNAMAIAE---LTDKLGLOH-----LRNRTWYVQATCATQGTGLYEGLDWLS N  
ScCIN4 88 QAMIVCIDVSLSMRFBETLQELKELINRDNENRIGYCAVIVLNNKIDIVEPKSELHRRCLLVESELKCLF-----K-P-DIRWELVQCSAVTGENLLPGIDWLLD  
HsAr14 94 DGIVFVVDSDVDERMEEAKTELHKITRISENQ---VPVLIYFNKQDLPNAMAIAE---LTDKLGLOH-----LRNRTWYVQATCATQGTGLYEGLDWLS N  
RnAr14 94 DGIVFVVDSDVDERMEEAKTELHKITRISENQ---VPVLIYFNKQDLPNAMAIAE---LTDKLGLOH-----LRNRTWYVQATCATQGTGLYEGLDWLS N  
[HsAr14b] 94 DGIVFVVDSDVDERMEEAKTELHKITRISENQ---VPVLIYFNKQDLPNAMAIAE---LTDKLGLOH-----LRNRTWYVQATCATQGTGLYEGLDWLS N  
[HsAr14c] 94 DGIVFVVDSDVDERMEEAKTELHKITRISENQ---VPVLIYFNKQDLPNAMAIAE---LTDKLGLOH-----LRNRTWYVQATCATQGTGLYEGLDWLS N  
HsAr17 87 DGIYVVDSDVDRLEEAATELHKVTKFAENQ---TPLLVFNKQDLPNAMAIAE---LTDKLGLOH-----LRNRTWYVQATCATQGTGLYEGLDWLS N  
RnAr14 95 DGIYVVDSDVDRLEEAATELHKVTKFAENQ---TPLLVFNKQDLPNAMAIAE---LTDKLGLOH-----LRNRTWYVQATCATQGTGLYEGLDWLS N  
DmAr14 72 DGLIFVVDSDVDERMEEAKTELHKITRISENQ---VPVLIYFNKQDLPNAMAIAE---LTDKLGLOH-----LRNRTWYVQATCATQGTGLYEGLDWLS N  
HsAr15 85 EFVIVVDSDDRERISVTRRELYKMLAHEDLRK---AGLLIFANKQDVPKCEMTVAE---ISQFLKLT-----I-K-DHQWHIQACCALTEGGLQGLEWMM S  
RnAr15 85 EFVIVVDSDDRERISVTRRELYKMLAHEDLRK---AGLLIFANKQDVPKCEMTVAE---ISQFLKLT-----I-K-DHQWHIQACCALTEGGLQGLEWMM S  
HsAr15like 85 EFVIVVDSDDRERISVTRRELYKMLAHEDLRK---AGLLIFANKQDVPKCEMTVAE---ISQFLKLT-----I-K-DHQWHIQACCALTEGGLQGLEWMM S  
DmAr15 85 ELVIMVIDSDDRERISVTRRELYKMLAHEDLRK---AGLLIFANKQDVPKCEMTVAE---ISQFLKLT-----I-K-DHQWHIQACCALTEGGLQGLEWMM S  
AtAr15 86 HAVIVVDSDDRERISVTRRELYKMLAHEDLRK---AGLLIFANKQDVPKCEMTVAE---ISQFLKLT-----I-K-DHQWHIQACCALTEGGLQGLEWMM S  
CeAr15 86 DVVIVVDSDDRERISVTRRELYKMLAHEDLRK---AGLLIFANKQDVPKCEMTVAE---ISQFLKLT-----I-K-DHQWHIQACCALTEGGLQGLEWMM S  
DmAr16 90 HGIVFVVDSDDRERISVTRRELYKMLAHEDLRK---AGLLIFANKQDVPKCEMTVAE---ISQFLKLT-----I-K-DHQWHIQACCALTEGGLQGLEWMM S  
HsAr16 86 QAIIFVVDSDDRERISVTRRELYKMLAHEDLRK---AGLLIFANKQDVPKCEMTVAE---ISQFLKLT-----I-K-DHQWHIQACCALTEGGLQGLEWMM S  
CeAr16 89 QGVIFVVDSDDRERISVTRRELYKMLAHEDLRK---AGLLIFANKQDVPKCEMTVAE---ISQFLKLT-----I-K-DHQWHIQACCALTEGGLQGLEWMM S  
HsARP 84 HGIVYVIDSDDEERLAEKQAFKVVVTEALCG---VPVLIYFNKQDLPNAMAIAE---LTDKLGLOH-----LRNRTWYVQATCATQGTGLYEGLDWLS N  
RnARP 94 HGIVYVIDSDDEERLAEKQAFKVVVTEALCG---VPVLIYFNKQDLPNAMAIAE---LTDKLGLOH-----LRNRTWYVQATCATQGTGLYEGLDWLS N  
DmARP 94 HGIVYVIDSDDRERISVTRRELYKMLAHEDLRK---AGLLIFANKQDVPKCEMTVAE---ISQFLKLT-----I-K-DHQWHIQACCALTEGGLQGLEWMM S  
ScAr13 93 HGIVYVIDSDDRERISVTRRELYKMLAHEDLRK---AGLLIFANKQDVPKCEMTVAE---ISQFLKLT-----I-K-DHQWHIQACCALTEGGLQGLEWMM S  
CeARP 94 NAMIFVVDSDDRERISVTRRELYKMLAHEDLRK---AGLLIFANKQDVPKCEMTVAE---ISQFLKLT-----I-K-DHQWHIQACCALTEGGLQGLEWMM S  
AtARP 93 HALIYVIDSDDRERISVTRRELYKMLAHEDLRK---AGLLIFANKQDVPKCEMTVAE---ISQFLKLT-----I-K-DHQWHIQACCALTEGGLQGLEWMM S  
DmSar1 89 DAVVFLVDADDERMEEAKTELHKITRISENQ---VPVLIYFNKQDLPNAMAIAE---LTDKLGLOH-----LRNRTWYVQATCATQGTGLYEGLDWLS N  
CeSar1 90 DAVVFLVDADDERMEEAKTELHKITRISENQ---VPVLIYFNKQDLPNAMAIAE---LTDKLGLOH-----LRNRTWYVQATCATQGTGLYEGLDWLS N  
HsSar1a 94 NGIVFLVDCAHDHRLVESKVELNLMDETISTN---MPILILGNKIDRPTDIAEAK---LGEIFGLYQGTGKGNVTLKQLNVRPAEFTCSVLQRQTYREGF----  
HsSar1b 94 NGIVFLVDCAHDHRLVESKVELNLMDETISTN---MPILILGNKIDRPTDIAEAK---LGEIFGLYQGTGKGNVTLKQLNVRPAEFTCSVLQRQTYREGF----  
[HsSar1c] 94 NGIVFLVDCAHDHRLVESKVELNLMDETISTN---MPILILGNKIDRPTDIAEAK---LGEIFGLYQGTGKGNVTLKQLNVRPAEFTCSVLQRQTYREGF----  
AtSar1a 89 DAVVFLVDADDERMEEAKTELHKITRISENQ---VPVLIYFNKQDLPNAMAIAE---LTDKLGLOH-----LRNRTWYVQATCATQGTGLYEGLDWLS N  
AtSar1c 89 DAVVFLVDADDERMEEAKTELHKITRISENQ---VPVLIYFNKQDLPNAMAIAE---LTDKLGLOH-----LRNRTWYVQATCATQGTGLYEGLDWLS N  
AtSar1b 89 DAVVFLVDADDERMEEAKTELHKITRISENQ---VPVLIYFNKQDLPNAMAIAE---LTDKLGLOH-----LRNRTWYVQATCATQGTGLYEGLDWLS N  
AtSar1b' 89 DAVVFLVDADDERMEEAKTELHKITRISENQ---VPVLIYFNKQDLPNAMAIAE---LTDKLGLOH-----LRNRTWYVQATCATQGTGLYEGLDWLS N  
ScSar1 92 NGIVFLVDADDERMEEAKTELHKITRISENQ---VPVLIYFNKQDLPNAMAIAE---LTDKLGLOH-----LRNRTWYVQATCATQGTGLYEGLDWLS N  
HsAr18a 90 SAIVYVMDAADQEKIEASKNELHNLDPKQLQ---IPVILVGNKIDRPTDIAEAK---LGEIFGLYQGTGKGNVTLKQLNVRPAEFTCSVLQRQTYREGF----  
HsAr18b 90 SAIVYVMDAADQEKIEASKNELHNLDPKQLQ---IPVILVGNKIDRPTDIAEAK---LGEIFGLYQGTGKGNVTLKQLNVRPAEFTCSVLQRQTYREGF----  
DmAr18 90 SAIVYVMDAADQEKIEASKNELHNLDPKQLQ---IPVILVGNKIDRPTDIAEAK---LGEIFGLYQGTGKGNVTLKQLNVRPAEFTCSVLQRQTYREGF----  
CeAr18 90 SAIVYVMDAADQEKIEASKNELHNLDPKQLQ---IPVILVGNKIDRPTDIAEAK---LGEIFGLYQGTGKGNVTLKQLNVRPAEFTCSVLQRQTYREGF----  
AtAr18a 89 SAIVYVMDAADQEKIEASKNELHNLDPKQLQ---IPVILVGNKIDRPTDIAEAK---LGEIFGLYQGTGKGNVTLKQLNVRPAEFTCSVLQRQTYREGF----  
AtAr18b 89 SAIVYVMDAADQEKIEASKNELHNLDPKQLQ---IPVILVGNKIDRPTDIAEAK---LGEIFGLYQGTGKGNVTLKQLNVRPAEFTCSVLQRQTYREGF----  
AtAr18c 89 SAIVYVMDAADQEKIEASKNELHNLDPKQLQ---IPVILVGNKIDRPTDIAEAK---LGEIFGLYQGTGKGNVTLKQLNVRPAEFTCSVLQRQTYREGF----

|            |       |                                                        |
|------------|-------|--------------------------------------------------------|
| HsArf6     | 172   | NYKS-----                                              |
| RnArf6     | 172   | NYKS-----                                              |
| DmArf3     | 172   | NHKL-----                                              |
| CeArf6     | 172   | NCKP-----                                              |
| ScArf3     | 176   | NTNVPKK-----                                           |
| HsArf4     | 176   | ELSKR-----                                             |
| RnArf4     | 176   | ELSKR-----                                             |
| HsArf5     | 176   | ELSKR-----                                             |
| RnArf5     | 176   | ELSKR-----                                             |
| DmArf2     | 176   | ELAKK-----                                             |
| CeArf2     | 176   | QLSKT-----                                             |
| DmArf1     | 176   | QLKNANR-----                                           |
| CeArf1     | 176   | QLKNRS-----                                            |
| HsArf1     | 176   | QLRNQK-----                                            |
| RnArf1     | 176   | QLRNQK-----                                            |
| HsArf3     | 176   | QLKNKK-----                                            |
| RnArf3     | 176   | QLKNKK-----                                            |
| RnArf2     | 176   | QLKNQK-----                                            |
| AtArf3     | 176   | NIAGVNVYHKQQF-----                                     |
| AtArf4     | 176   | NIAGKA-----                                            |
| AtArf2     | 176   | NIASKA-----                                            |
| AtArf5     | 176   | NIASKVRLLS-----                                        |
| AtArf1     | 176   | NIANKA-----                                            |
| AtArf6     | 176   | NIATKVNNLNIPF-----                                     |
| ScArf1     | 175   | SLKNST-----                                            |
| ScArf2     | 175   | NLKNQS-----                                            |
| AtArf9     | 176   | TI PNKPERSTSVSSFRSDSYERKLVGPRY-----                    |
| CeArf7     | 176   | QMKT-----                                              |
| AtArf7     | 176   | TLKDVKAAGFTSVGHSF-----                                 |
| AtArf8     | 176   | TLKEVKAAGYSSVGPSPF-----                                |
| DmAr11     | 175   | TLQSRK-----                                            |
| CeAr11     | 175   | QLQQKK-----                                            |
| HsAr11     | 176   | TLKSRQ-----                                            |
| RnAr11     | 176   | TLKSRQ-----                                            |
| ScAr11     | 177   | VIKEEQL-----                                           |
| HsAr12     | 175   | DISSRIFTAD-----                                        |
| RnAr12     | 175   | DISSRVFTAD-----                                        |
| DmAr12     | 175   | DIKRIFITLD-----                                        |
| CeAr12     | 175   | DVGSRLFILD-----                                        |
| AtTITAN5   | 176   | DIASRIYMLD-----                                        |
| HsAr13     | 176   | NVNAKKK-----                                           |
| RnAr13     | 176   | NVNAKKK-----                                           |
| DmAr13     | 176   | NMKK-----                                              |
| CeAr13     | 177   | NLKPASKK-----                                          |
| ScCIN4     | 186   | SCHFTQ-----                                            |
| HsAr14     | 185   | MI IKRRK-----MLRQQKKKR-----                            |
| RnAr14     | 185   | MI IKRRK-----MLRQQKKKR-----                            |
| [HsAr14b]  | 185   | MI IKRRK-----MLRQQKKKDEYQYLLYLCGVGFLWSDFDK-----        |
| [HsAr14c]  | 185   | MI KEKMNINTYYICVEEVFSGLILTNKGKSTAWFACLPWMLLKLCIVQ----- |
| HsAr17     | 178   | MILKRRK-----SLKQKKKR-----                              |
| HsAr4L     | 186   | MILKRRK-----AARGGKKRR-----                             |
| DmAr14     | ----- | -----                                                  |
| HsAr15     | 175   | RLKIR-----                                             |
| RnAr15     | 175   | RLKIR-----                                             |
| HsAr15like | 175   | RIGVR-----                                             |
| DmAr15     | 175   | RIKKN-----                                             |
| AtAr15     | 176   | KVTGKATS-----                                          |
| CeAr15     | 177   | NL-----                                                |
| DmAr16     | 182   | OMRFAMLNKNNAKSRSKHSK-----                              |
| HsAr16     | 180   | QIQTVKT-----                                           |
| CeAr16     | 181   | ETKYMESRRT-----                                        |
| HsARP      | 186   | CVVRN-VHRPPRQDIT-----                                  |
| RnARP      | 186   | CVVRN-VHRPPRQDIT-----                                  |
| DmARP      | 186   | AIKRHAVVRPPREND-----                                   |
| ScAr13     | 185   | RLERNKKSRRPIYK-----                                    |
| CeARP      | 183   | SLASQPLYL-----                                         |
| AtARP      | 183   | VMEKSKRTESLRARAGYTPVPNS-----                           |
| DmSar1     | 191   | YID-----                                               |
| CeSar1     | 192   | YL-----                                                |
| HsSar1a    | 196   | YID-----                                               |
| HsSar1b    | 196   | YID-----                                               |
| [HsSar1c]  | ----- | -----                                                  |
| AtSar1a    | 191   | YIK-----                                               |
| AtSar1c    | 191   | YID-----                                               |
| AtSar1b    | 191   | YIN-----                                               |
| AtSar1b'   | 191   | YIK-----                                               |
| ScSar1     | 189   | YI-----                                                |
| HsAr18a    | 180   | HSKSRRS-----                                           |
| HsAr18b    | 180   | HSKSRRS-----                                           |
| DmAr18     | 180   | HSKSQSR-----                                           |
| CeAr18     | 180   | HSKAQR-----                                            |
| AtAr18a    | 179   | HSKSKN-----                                            |
| AtAr18b    | 179   | HSKSSN-----                                            |
| AtAr18c    | 179   | HSRTAT-----                                            |
